# Supplementary material for: Astrocytes gate Hebbian synaptic plasticity in the striatum
Source: PubMed Central journal article supplement (PMC5187441; doi:10.1038/ncomms13845), 2016-12-20
Supplement: ncomms13845-s1.pdf [file ncomms13845-s1.pdf]

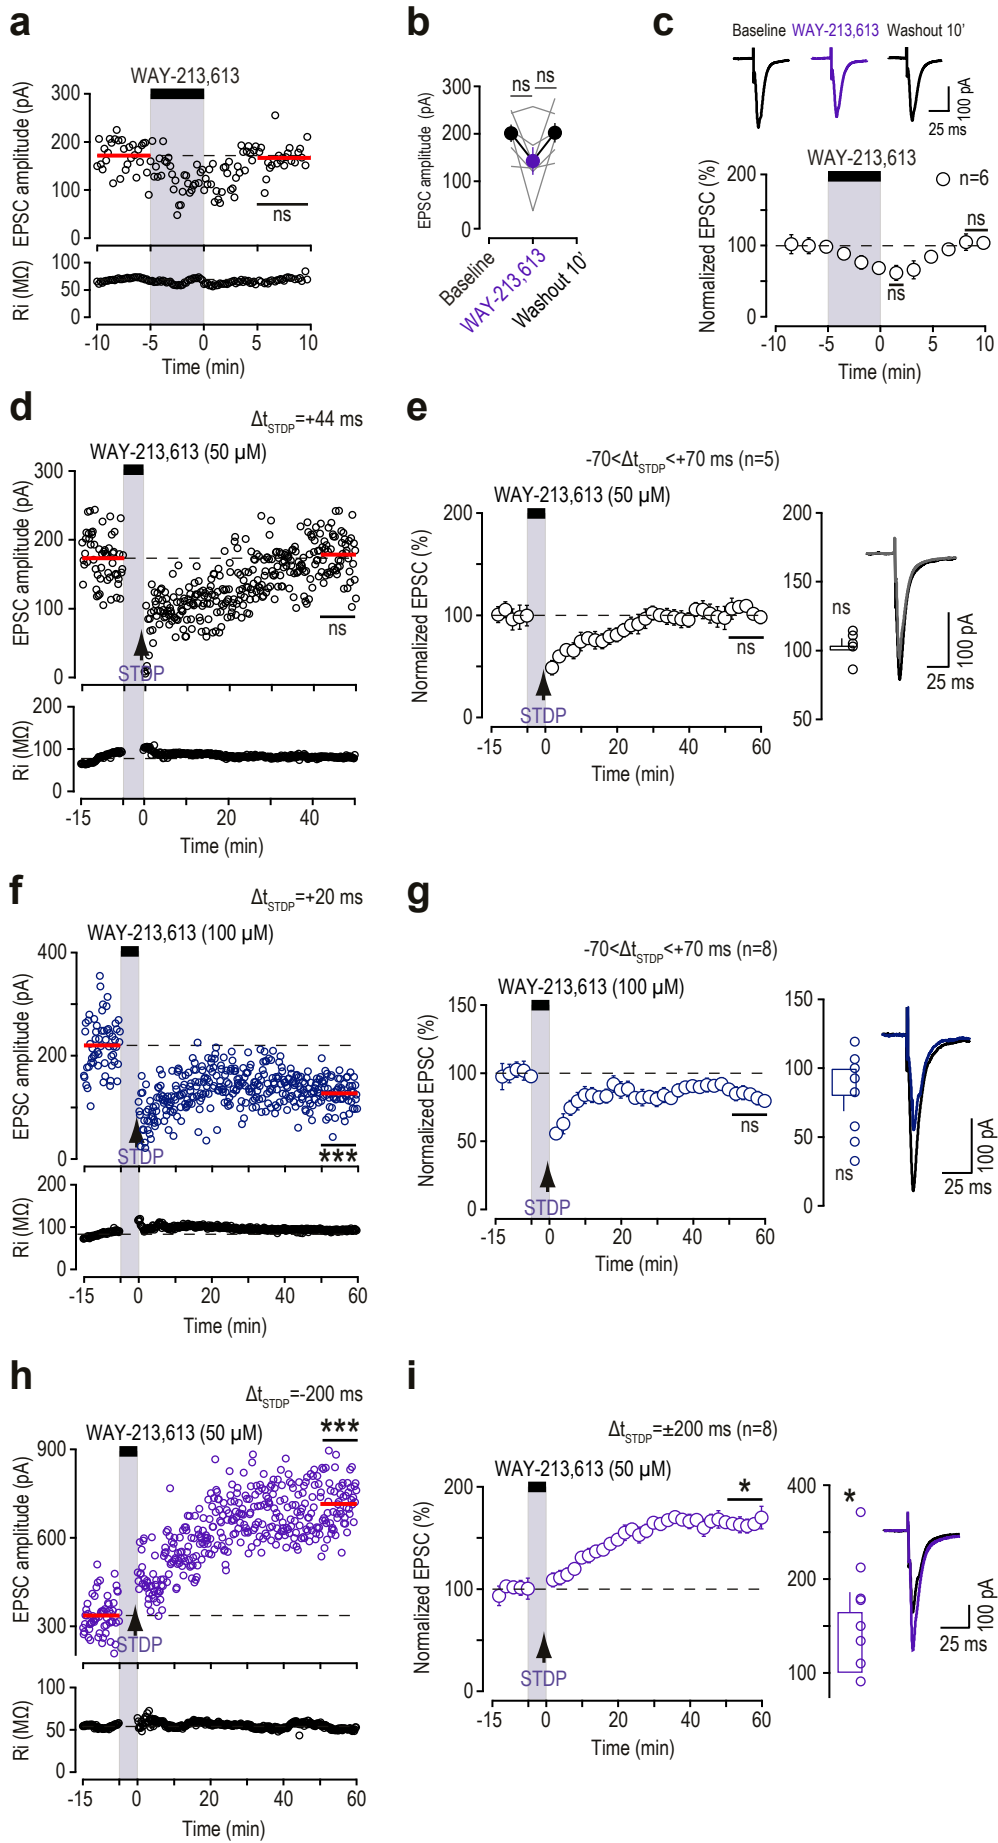

1

2

3 **Supplementary Figure 1. The transient inhibition of EAAT2 by WAY-213,613 disrupts**

4 **STDP**

5 (a-c) WAY-213,613 application had no effect on the changes in synaptic efficacy estimated  
6 from WAY-213,613 washout (example in a, and averaged time-course of experiments in b  
7 and c). The brief application of WAY-213,613 induced a non-significant transient decrease in  
8 EPSC amplitude, with no change in Ri. The effect of WAY-213,613 on synaptic transmission  
9 was, thus, compatible with the estimation of long-term synaptic efficacy changes. (d)

10 Example of the lack of plasticity observed with 100 pre-post pairings ( $t_{STDP}=+44$  ms) during  
11 the transient blockade of EAAT2 with WAY-213,613 (50  $\mu$ M for 5 min, gray area). Top,  
12 EPSC strength before and after pairings. Bottom, time course of Ri (baseline,  $79\pm 1M\Omega$ ; 50-60  
13 min after pairings,  $81\pm 0.2M\Omega$ ; change of 2%). (e) Averaged time-course of experiments with  
14 a transient blockade of EAAT2 with WAY-213,613 (50  $\mu$ M), with the absence of plasticity  
15 induction for pairings at  $-70 < t_{STDP} < +70$  ms. (f) Example of LTD induced by 100 pre-post  
16 pairings ( $t_{STDP}=+20$  ms) with a transient blockade of EAAT2 with WAY-213,613 (100  $\mu$ M).

17 Top, EPSC strength before and after pairings. Bottom, time course of Ri (baseline,  
18  $84\pm 0.2M\Omega$ ; 50-60 min after pairings,  $92\pm 0.2M\Omega$ ; change of 11%). (g) Averaged time-course  
19 of experiments with a transient blockade of EAAT2 with WAY-213,613 (50  $\mu$ M), with no  
20 significant induction of plasticity for pairings at  $-70 < t_{STDP} < +70$  ms. However, it should be

21 noted that LTD was more frequent (5/8 cells) when induced with 100  $\mu$ M WAY-213,613 than  
22 when induced with 50  $\mu$ M WAY-213,613 (1/5 cells). (h) Example of LTP induced by 100  
23 post-pre pairings ( $t_{STDP}=-200$  ms) with a transient blockade of EAAT2 with WAY-213,613  
24 (50  $\mu$ M) (Ri, baseline:  $54\pm 0.3M\Omega$ ; 50-60 min after pairings:  $52\pm 0.3M\Omega$ ; change of -4%). (h)

25 Example of LTP induced by 100 post-pre pairings ( $t_{STDP}=-200$  ms) with a transient blockade

26 of EAAT2 with WAY-213,613 (50  $\mu$ M). Top, EPSC strength before and after pairings.  
27 Bottom, time course of  $R_i$  (baseline,  $54 \pm 0.3 M\Omega$ ; 50-60 min after pairings,  $52 \pm 0.3 M\Omega$ ; change  
28 of -4%). (i) Averaged time-course of experiments with transient EAAT2 blockade with  
29 WAY-213,613 during pairings, inducing LTP for  $t_{STDP} = \pm 200$  ms pairings.

30 Insets correspond to the average of 60 EPSCs during baseline and at 1 hour after STDP  
31 pairings. Error bars represent the SD (except in panel b and bar graphs: SEM). \*:  $p < 0.05$ ;  
32 \*\*\*:  $p < 0.001$ ; ns: not significant by unpaired t test, two-tailed (**a,d,f,h**), one-way repeated-  
33 measures ANOVA; post hoc Bonferroni-corrected pairwise comparisons (**b**) or one sample  
t test, two-tailed (**c,e,g,i**).

**a**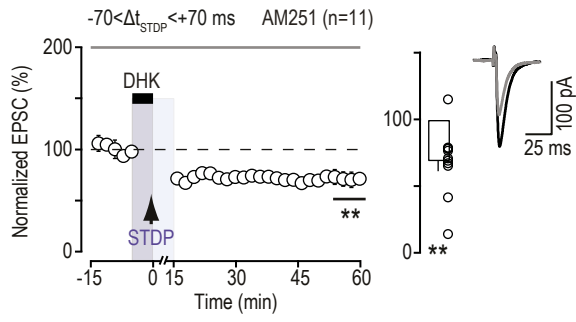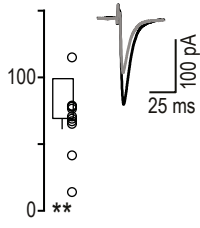**b**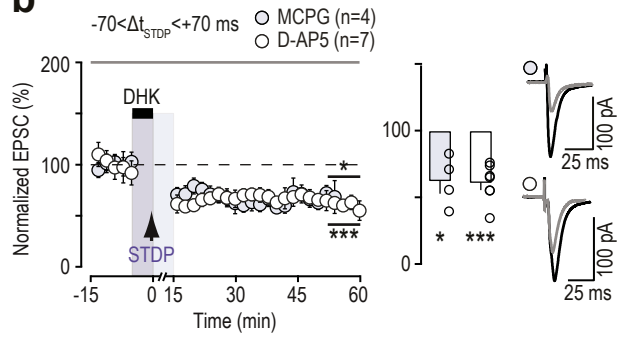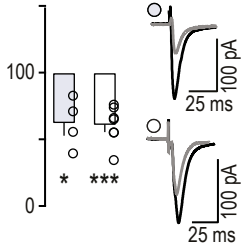

35

36 **Supplementary Figure 2. LTD under transient EAAT2 blockade is not CB<sub>1</sub>R-, type I/II**

37 **mGluRs- or NMDAR-mediated**

38 (a) LTD under transient EAAT2 blockade for pairings at  $-70 < t_{\text{STDP}} < +70$  ms was not

39 dependent on CB<sub>1</sub>R activation, because AM251 (3  $\mu$ M) failed to prevent LTD. (b) LTD  
was

40 not mediated by type-I/II mGluR or NMDAR, because MCPG (500  $\mu$ M) or D-AP5 (50  
 $\mu$ M)

41 failed to block LTD.

42 Insets correspond to the average of 60 EPSCs during baseline and at 1 hour after STDP

43 pairings. Error bars represent the SD (except in bar graphs: SEM). \*:  $p < 0.05$ ; \*\*:  $p < 0.01$ ; \*\*\*:

44  $p < 0.001$  by one sample t test.

45

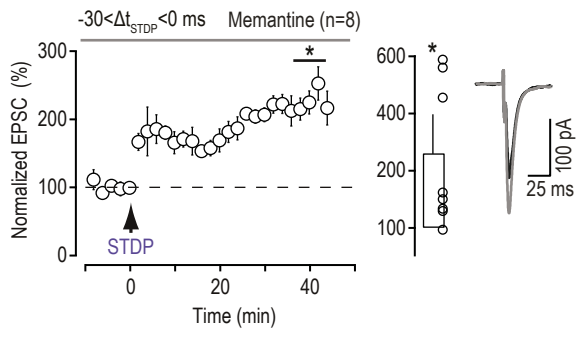

45

46 **Supplementary Figure 3. t-LTP is not dependent on extrasynaptic NMDARs**

47 Memantine (10  $\mu$ M) did not affect t-LTP for pairings at  $-30 < t_{\text{STDP}} < 0$  ms in control  
48 conditions.

49 Insets correspond to the average of 60 EPSCs during baseline and at 1 hour after STDP

50 pairings. Error bars represent the SD (except in bar graph: SEM). \*:  $p < 0.05$  by one sample t

51 test.





52

53 **Supplementary Figure 4. Postsynaptic subthreshold activity fails to induce plasticity**  
54 **under EAAT2 blockade**

55 (a) Protocol consisting of postsynaptic subthreshold depolarization without paired presynaptic  
56 stimulation repeated 100 times at 1 Hz, under EAAT2 blockade. (b) This protocol did not  
57 induce plasticity.

58 Insets correspond to the average of 60 EPSCs during baseline and at 1 hour after STDP  
59 pairings. Error bars represent the SD (except in bar graph: SEM). ns: not significant by one  
60 sample t test.

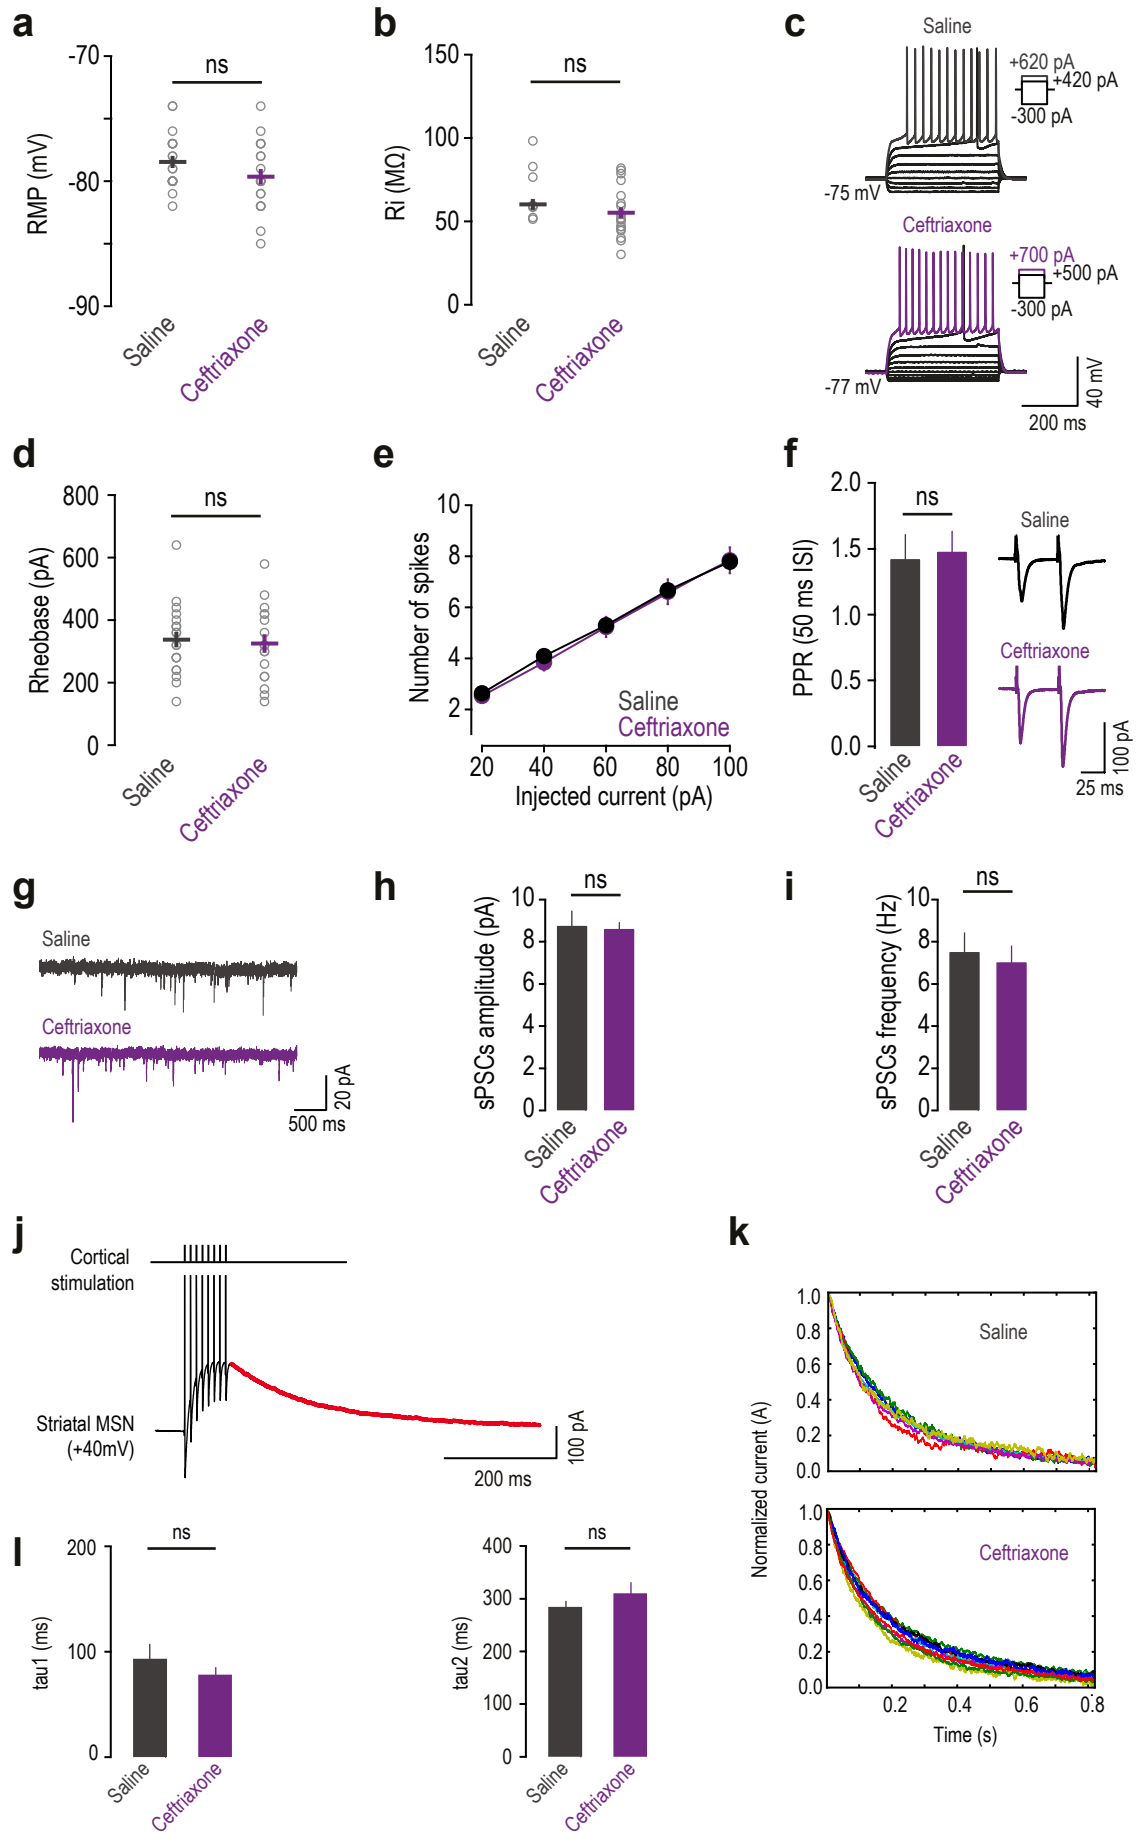

61

62 **Supplementary Figure 5.**

63 **MSN properties did not differ between saline- and ceftriaxone-injected rats**

64 **(a, b)** The passive electrophysiological properties, RMP **(a)** and Ri **(b)**, of MSNs did not  
65 differ between saline- and ceftriaxone-injected rats ( $n=20$  in both groups). **(c)**  
Characteristic

66 voltage responses of MSNs from saline- and ceftriaxone-injected rats to a series of 500 ms

67 current pulses. **(d)** The rheobase of MSNs did not differ between saline- and ceftriaxone-

68 injected rats ( $n=20$  in both groups). **(e)** Number of elicited spikes plotted as a function of 500

69 ms current pulses of increasing amplitude in saline- and ceftriaxone-injected rats. No

70 difference was found between the two groups. **(f)** Paired-pulse ratio at 20 Hz induced

71 facilitation did not differ between saline- and ceftriaxone-injected rats ( $n=13$  and  $n=16$ ,

72 respectively). **(g)** Traces of sPSCs from saline- and ceftriaxone-injected rats. **(h, i)** No

73 difference was found in the amplitude **(h)** and frequency **(i)** of sPSCs between the two groups

74 ( $n=13$  and  $n=12$ , respectively). **(j)** Stimulation protocol for recording NMDAR-EPSCs. Eight

75 presynaptic stimulation pulses were elicited at 100 Hz and neurons were recorded at +40 mV

76 holding voltage. Decay time of NMDAR-EPSCs was analyzed (red trace). **(k)** Normalized

77 currents from saline- and ceftriaxone-treated rats: each color represents a single neuron. **(l)**

78 The fast and slow decay times ( $\tau_1$  and  $\tau_2$ , respectively) of NMDAR-EPSCs do not  
show

79 significant difference between saline- and ceftriaxone-injected rats.

80 Error bars represent the SEM. ns: not significant by unpaired t test, two-tailed.

81
